# Supplementary material for: Ligand-stabilized Pt nanoparticles (NPs) as novel materials for catalytic gas sensing: influence of the ligand on important catalytic properties
Source: Royal Society of Chemistry journal article supplement (doi:10.1039/c4cp02993c), 2014-08-22
Supplement: c4cp02993c1.pdf [file c4cp02993c1.pdf]

## Supplementary Information

### Ligand-stabilized Pt nanoparticles (NPs) as novel materials for catalytic gas sensing: Influence of the ligand on important catalytic properties

*Eva Morsbach<sup>1</sup>, Eike Brauns<sup>2</sup>, Thomas Kowalik<sup>3</sup>, Walter Lang<sup>2</sup>, Sebastian Kunz<sup>1\*</sup>, Marcus Bäumer<sup>1</sup>*

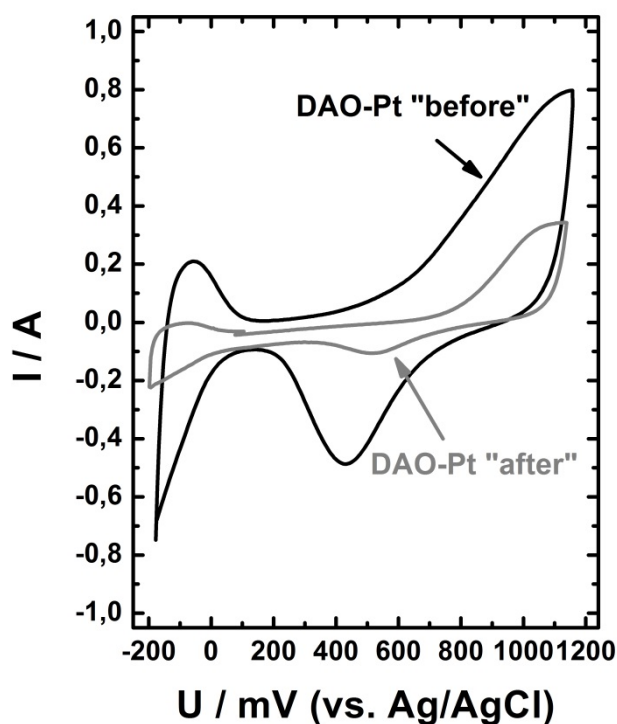

*Figure S1: Cyclic voltammogram of DAO-Pt before (black) and after (gray) H<sub>2</sub> oxidation. The Pt reduction peak between 700 – 200 mV (negative sweep) is proportional to the amount of free Pt surface atoms. The shift to higher potentials is due to bigger crystallites (= sintering of NPs).*

Figure S1 shows the cyclic voltammogram of DAO-Pt before and after H<sub>2</sub> oxidation. The peak areas of a cyclic voltammogram are proportional to the surface area of the sample. The decreased peak areas after H<sub>2</sub> oxidation confirm a loss of the catalyst's surface area after H<sub>2</sub> oxidation. Additionally, the Pt reduction peak (negative sweep between 200-700 mV) shifts to higher potentials, which indicates that

bigger Pt crystallites instead of nanoparticles are the catalytically active species.<sup>13</sup> It can thus be concluded that the deactivation of the sensor can be related to sintering of the catalytically active NPs.

*Table S 1: Ligand coverage of Pt NPs for different ligands*

|                 | “pure” Pt NPs | HDA-Pt | aniline-Pt | DAO-Pt | PDA-Pt | BiPy-Pt |
|-----------------|---------------|--------|------------|--------|--------|---------|
| Ligand coverage | 0             | 1      | 0.92       | 0.39   | 0.47   | 0.34    |

The ligand coverages for ligand-linked NPs have been determined via the electrochemical surface area. Determination via elemental ratios by AAS/elemental analysis does not reflect the ligand coverages due to different degrees of cross-linking for the bifunctional ligands.<sup>9</sup>

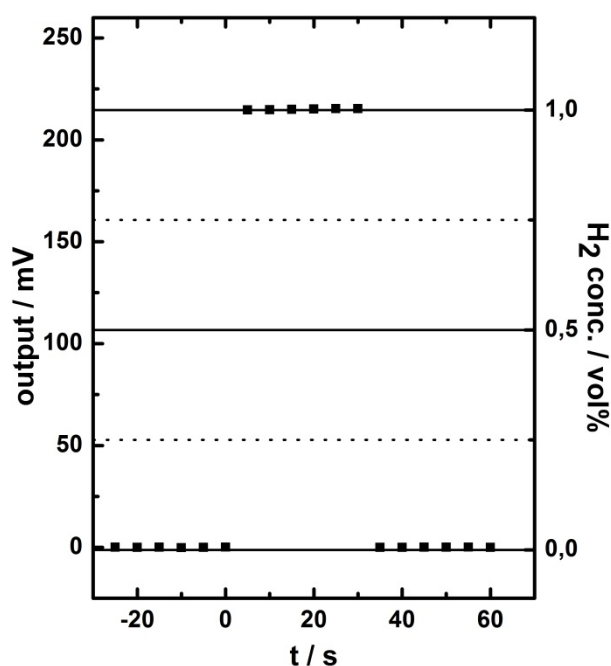

*Figure S2: Response of an activated sensor that is kept at operating temperature without the presence of H<sub>2</sub> ( $t < 0s$ ) towards a hydrogen pulse.*

Figure S2 shows the immediate response of an activated sensor that is kept under operating conditions but without the presence of H<sub>2</sub>. No additional activation is required after the pre-treatment and the sensor achieves 90% of its maximum output of 220 mV within <150 ms.<sup>6</sup>

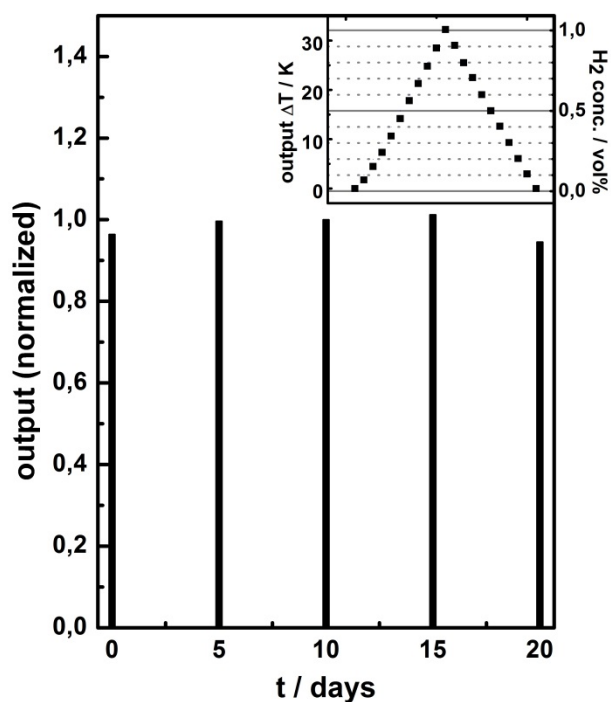

*Figure S3: Pulsed long-term measurement of PDA-Pt sensor. The sensor has been kept in an atmosphere without H<sub>2</sub> (0 vol%) and has been exposed to H<sub>2</sub> every fifth day to investigate its performance for repeated measurements over a prolonged period of time. For every measurements the hydrogen concentration has been changed stepwise between 0 vol% and 1 vol% with step sizes of 0.1 vol%, shown as inset. No significant changes of the response times were obtained.*

An essential requirement for hydrogen sensors is a constant response towards H<sub>2</sub> over several runs. Figure S3 shows a long-term run of a PDA-Pt sensor that was kept at operating conditions for several weeks without a constant stream of hydrogen. Every 5th day the sensor was exposed to 1 vol% of H<sub>2</sub> and the output signal was recorded. During these measurements, the hydrogen concentration has been increased and decreased stepwise from 0 vol% to 1 vol% H<sub>2</sub> with stepsizes of 0.1 vol% H<sub>2</sub>. The stepwise response of the sensor towards H<sub>2</sub> on day 20 is displayed as an inset in Fig.S3. All obtained changes were within the limit of the experimental accuracy.

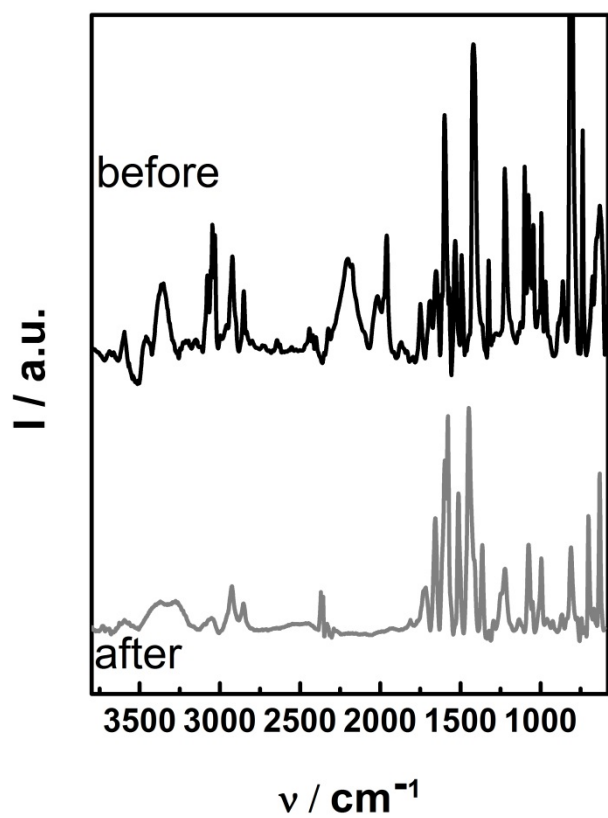

*Figure S4: Reflection-IR spectrum of BiPy-Pt before and after  $\text{H}_2$  oxidation.*
